# Supplementary material
Source: publisher figshare collection journal article supplement (https://tandf.figshare.com/ndownloader/files/20449218)
Supplement: Supplementary file 1 [file 20449218]

**Supporting Information for:**

**Discotic mesogens based on triphenylene-fused benzimidazole or perimidine: facile synthesis, mesomorphism, optical properties and self-assembly**

Sheng-Yuan Fan, *a* Hong-Tian Xu,*a* Qiang-Gen Li,*a* Dong-Mei Fang, *b* Wen-Hao Yu,*a* Shi-Kai Xiang,*a* Ping Hu,*a* Ke-Qing Zhao, *a* Chun Feng **a* and Bi-Qin Wang**a*

*a College of Chemistry and Materials Science, Sichuan Normal University, Chengdu, 610066, P.R. China.*

*b Chengdu Institute of Biology, Chinese Academy of Sciences, Chengdu 610041, P.R. China.*

***E-mail: fengc@sicnu.edu.cn(feng_chun@126.com); wangbiqin1964@126.com

**Contents:**

TGA curves................................................................................................................ S2

DSC curves................................................................................................................. S3

POM images...............................................................................................................S6

Representative X-ray Diffractograms............................................................................S8

DFT Calculations………………………………………………......……………….…S11

UV-Vis and Fluorescence Data .................................................................................…S12

NMR.............…………………………..........................................................................S13

HRMS..................................... ....................................................................................…S16

1. **TGA**


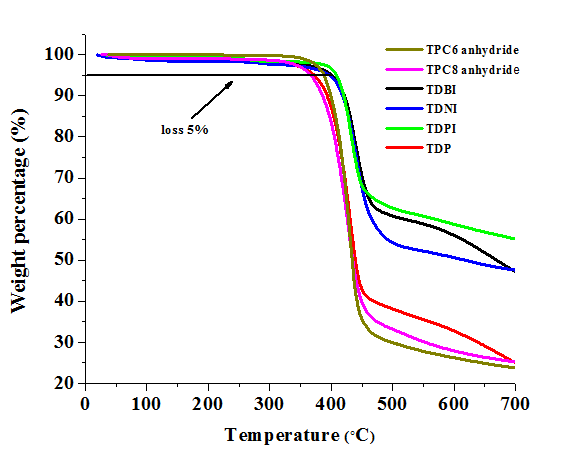


Figure S1. TGA curves of **TPC6 anhydride**, **TPC8 anhydride**, **TDBI**, **TDNI**, **TDPI**,and **TDP**. The measurements were performed under a nitrogen atmosphere, with heating and cooling rates of 10 oC min-1.

1. **Differential scanning calorimetry (DSC) curves**


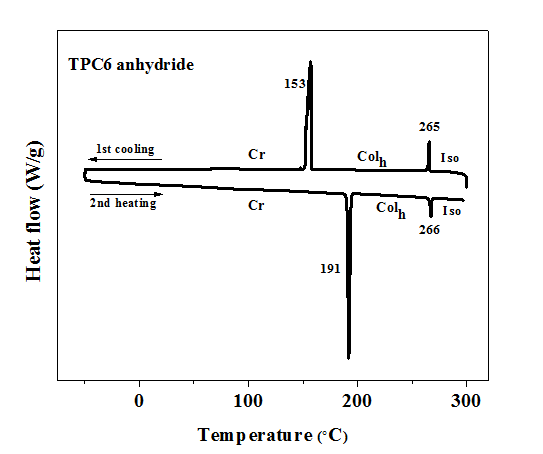


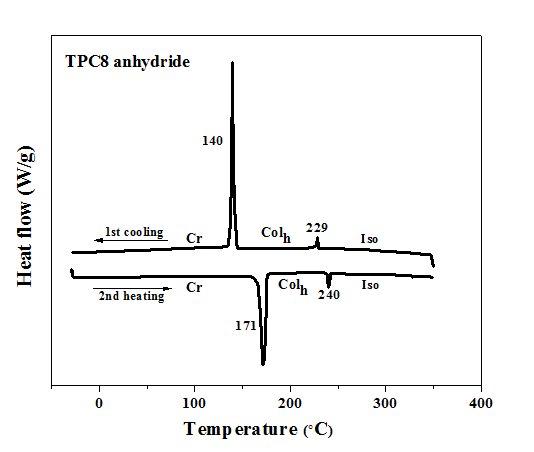


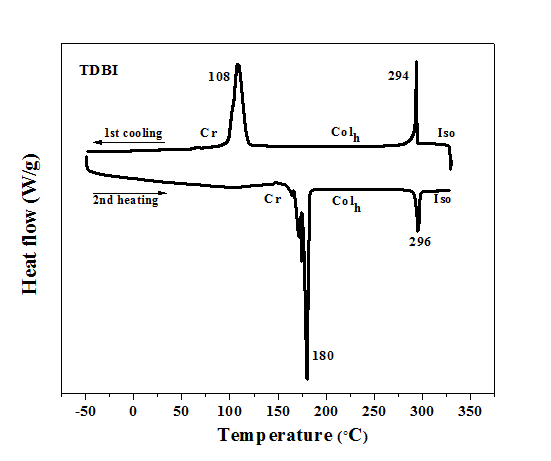


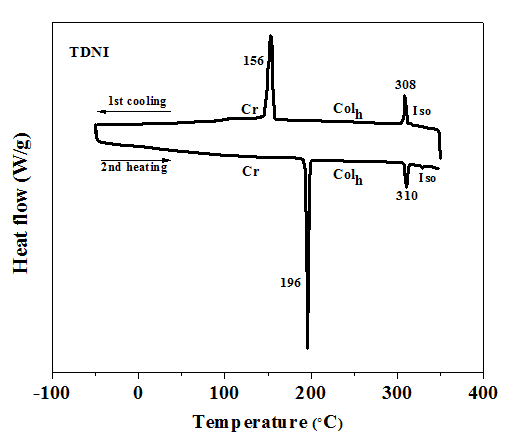


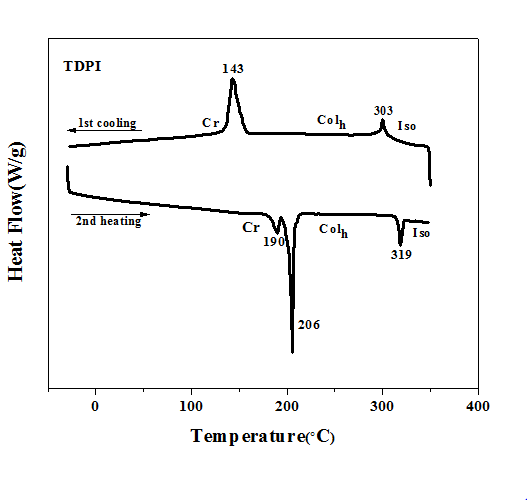


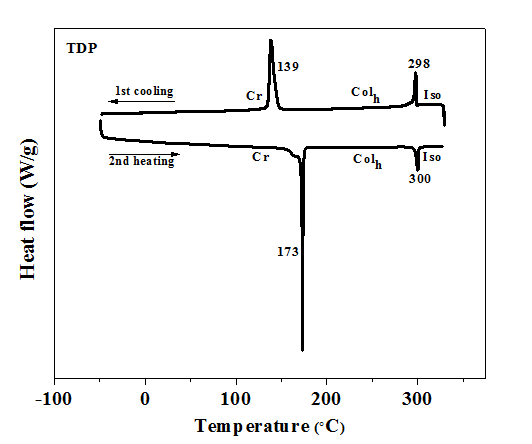


Figure S2. DSC curves of **TPC6 anhydride**, **TPC8 anhydride**, **TDBI**, **TDNI**, **TDPI**,and **TDP**. The measurements were performed under a nitrogen atmosphere, with heating and cooling rates of 10 oC min-1

1. **Polarizing optical microscopy images**


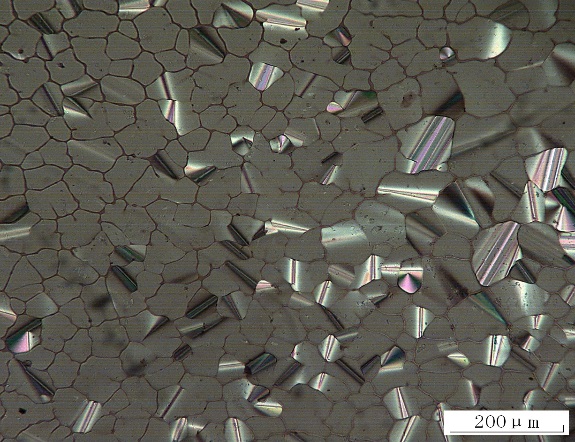

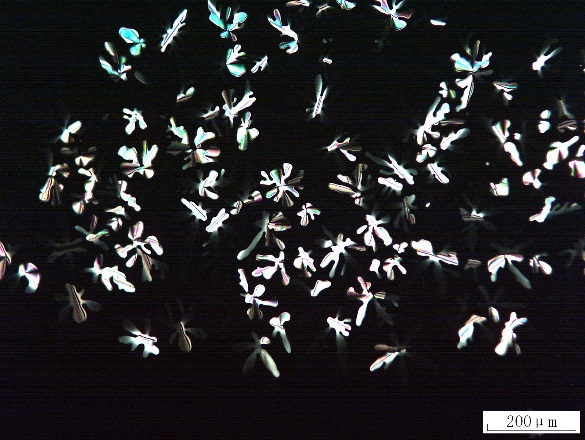


**TPC6 anhydride TPC8 anhydride**


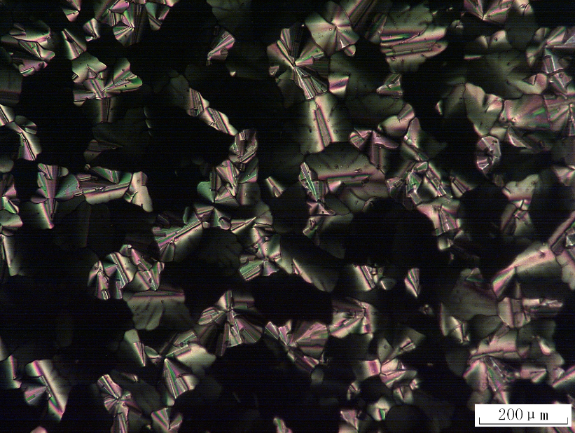

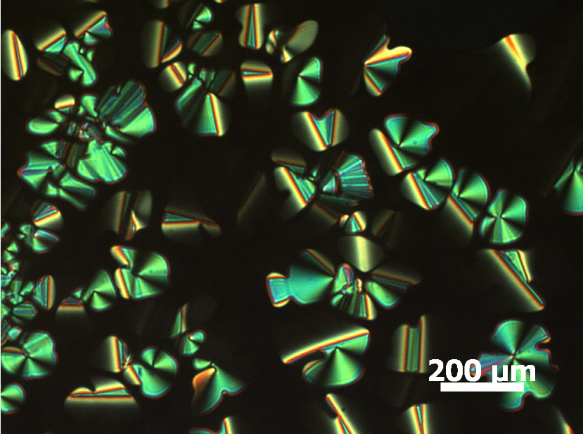


TDBI TDNI


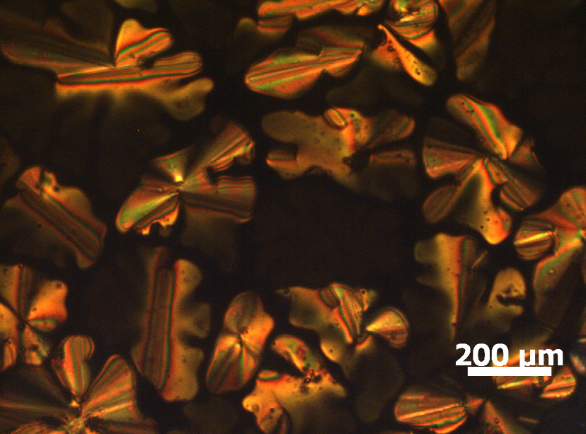

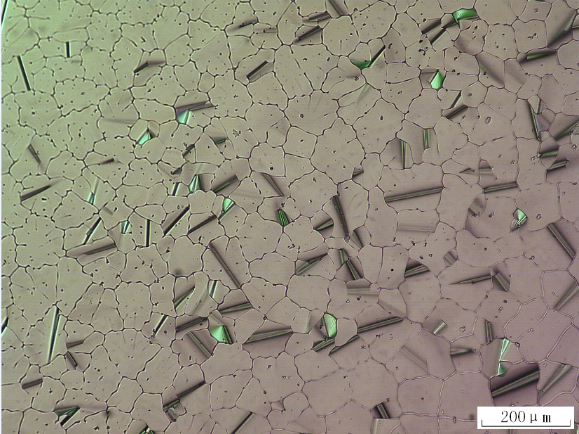


TDPI TDP

Figure S3. Polarized optical microscopy (POM) images of the drop-casted thin film of **TPC6 anhydride**, **TPC8 anhydride**, **TDBI**, **TDNI**, **TDPI**,and **TDP** between two glass slides observed under two crossed polarizers upon slow cooling (1-2 oC min-1) from the isotropic phase: **TPC6 anhydride** at 253 oC; **TPC8 anhydride** at 230 oC; **TDBI** at 281 oC; **TDNI** at 245 oC**; TDPI** at 270 oC; **TDP** at 259 oC.

1. **X-ray diffraction (XRD)**

**
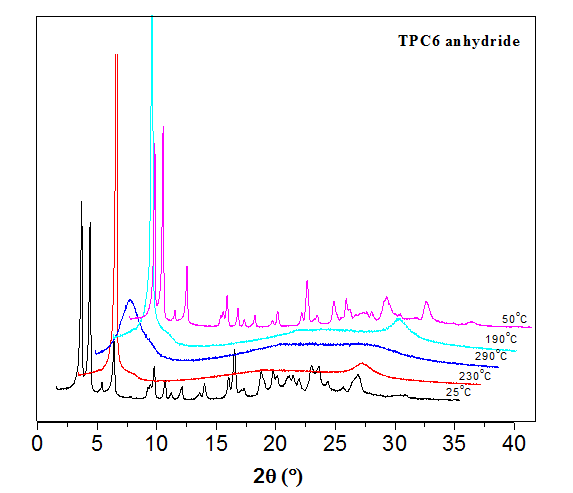
**


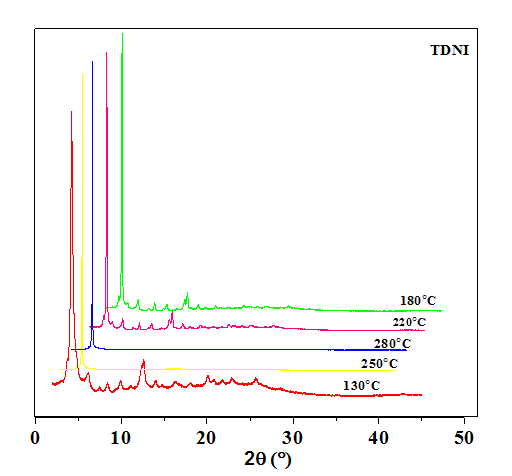

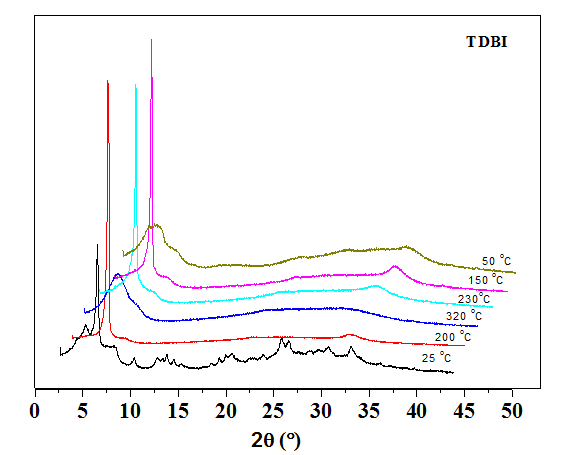


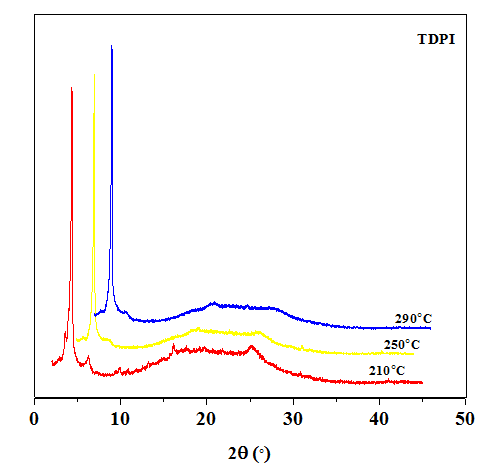


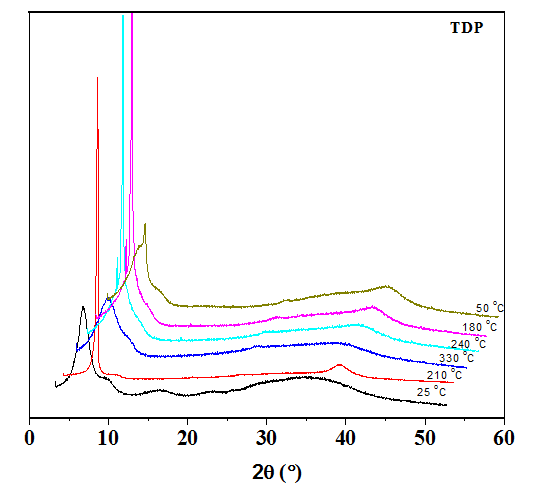


Figure S4. Representative XRD data for **TPC6 anhydride**, **TDBI**, **TDNI**, **TDPI**,and **TDP**.

1. **DFT Calculations**

Figure S5. Frontier molecular orbital profiles of **TPC8 anhydride**, **TDBI**, **TDNI**, **TDPI** and **TDP** based on DFT (B3LYP/6-31+G*) calculations (four alkoxy chains are replaced with methoxy groups for simplifying the calculations).

**7. UV-Vis and Fluorescence Data**

Figure S6. UV-Vis absorbance spectra of **TPC8 anhydride**, **TDBI**, **TDNI**, **TDPI**, and **TDP** in THF **(**10-5 M**)**.

Figure S7. The normalized photoluminescence spectra of **TPC8 anhydride**, **TDBI**, **TDNI**, **TDPI** and **TDP** in THF solutions (10-5 M, red) and films (black).

**7. NMR**

**
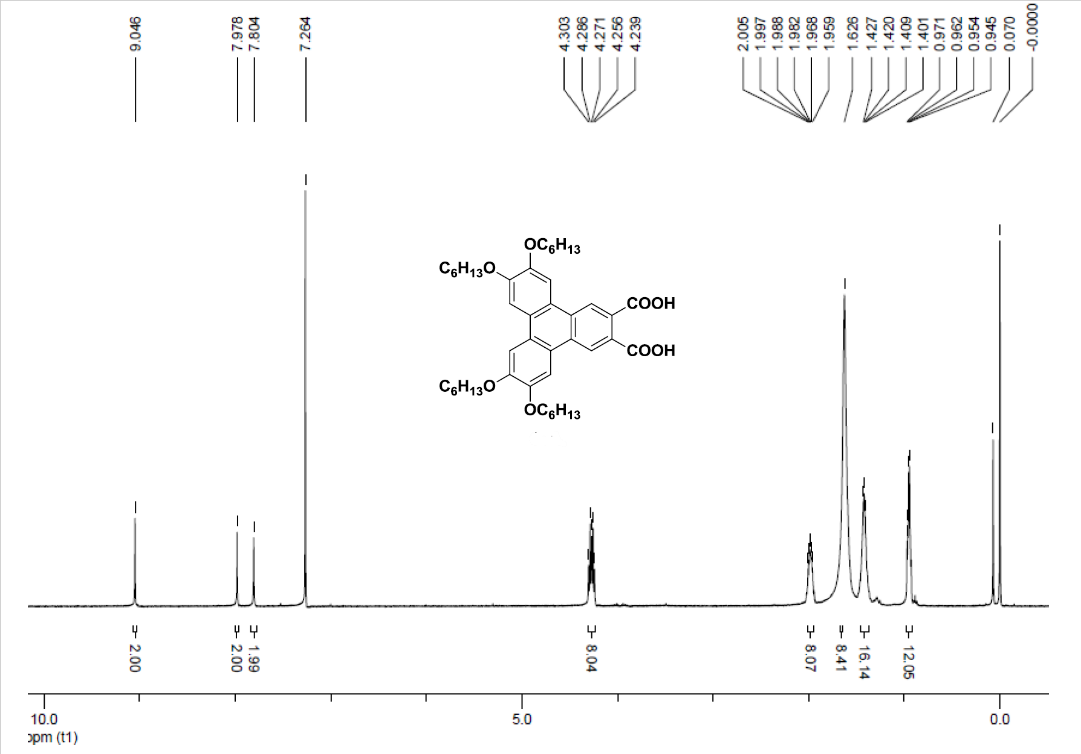
**

**
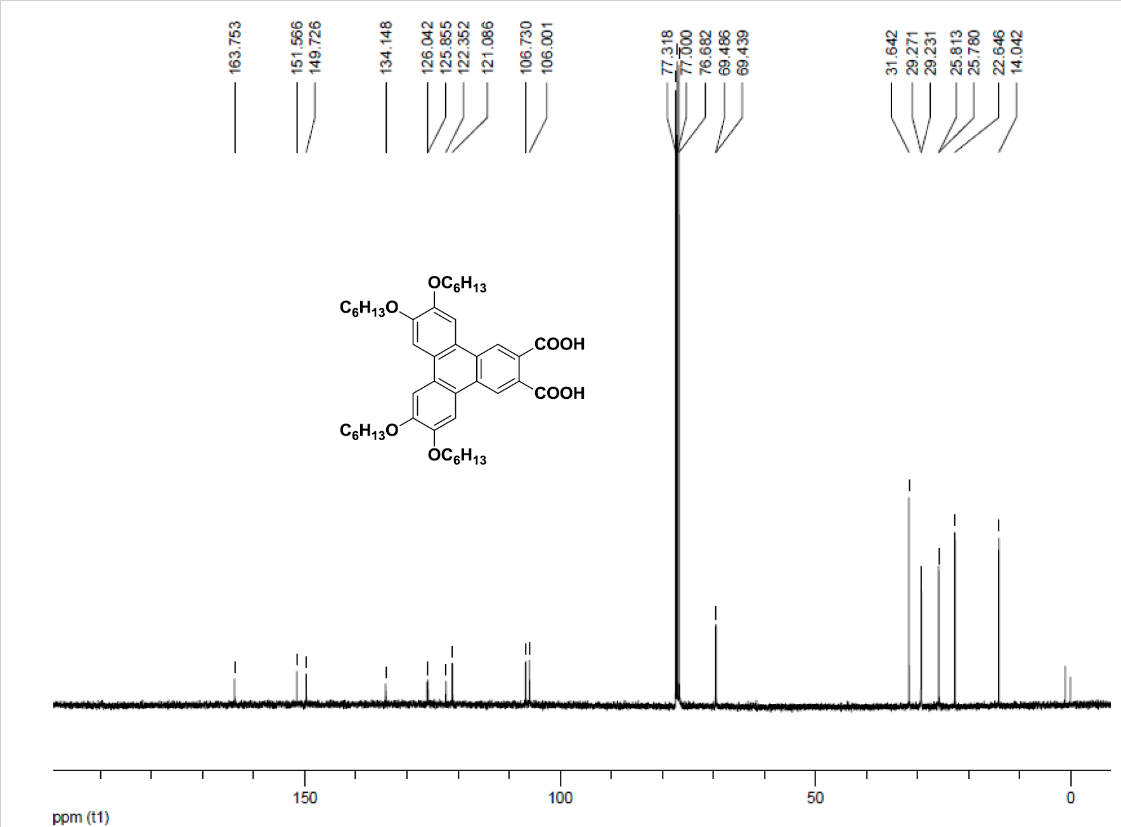
**


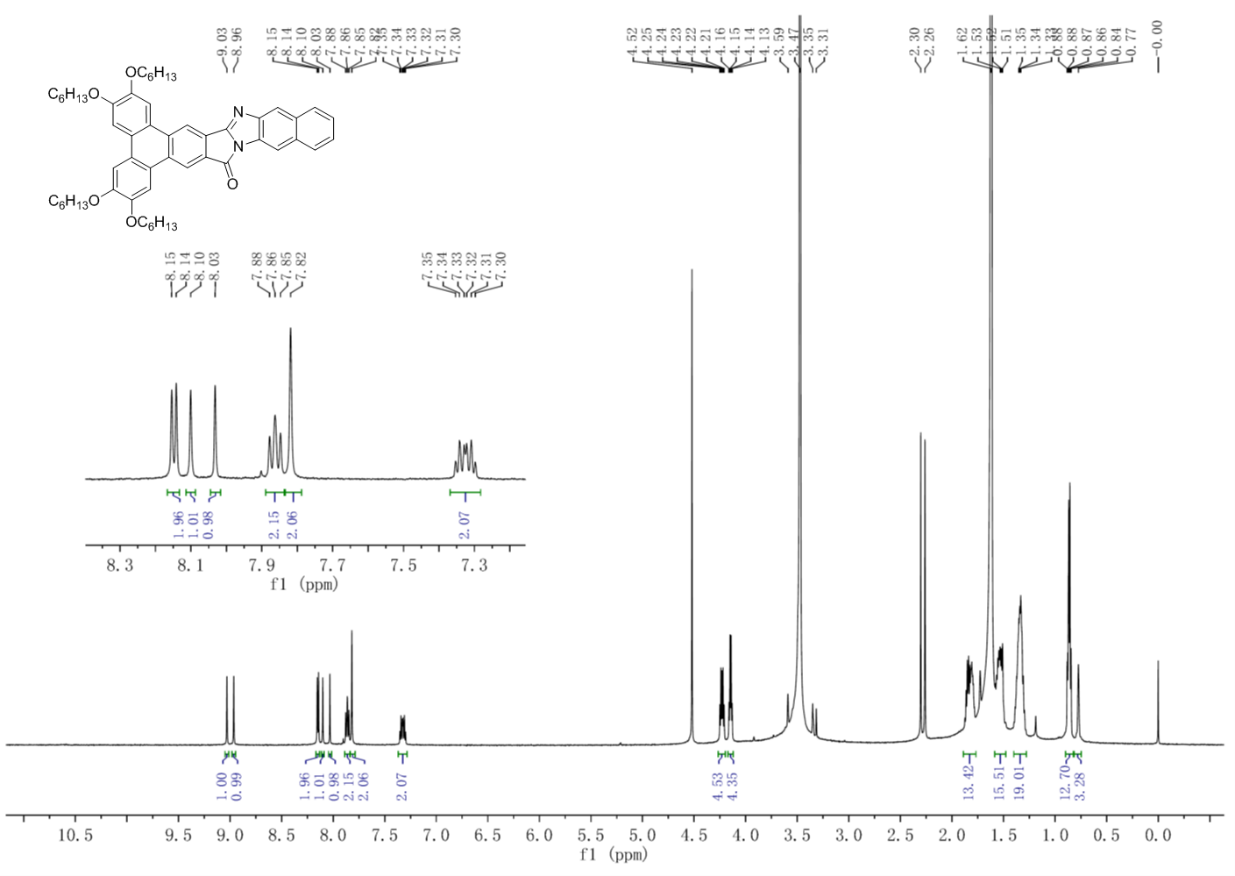


Figure S8. NMR of **TPC6 acid**, **TPC6 anhydride**, **TPC8 anhydride**, **TDBI**, and **TDP**.

8. **HRMS**

**
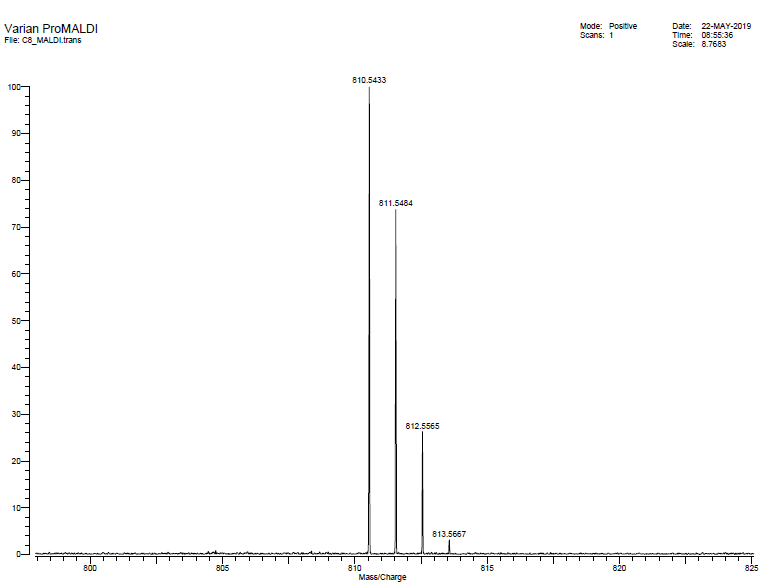
**


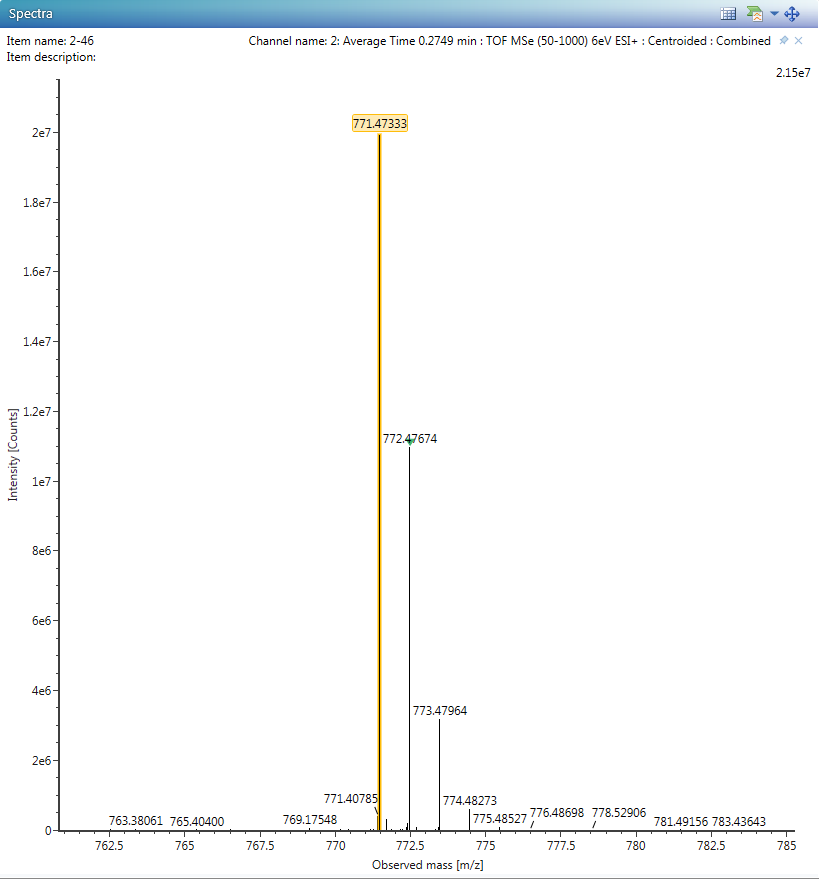


**
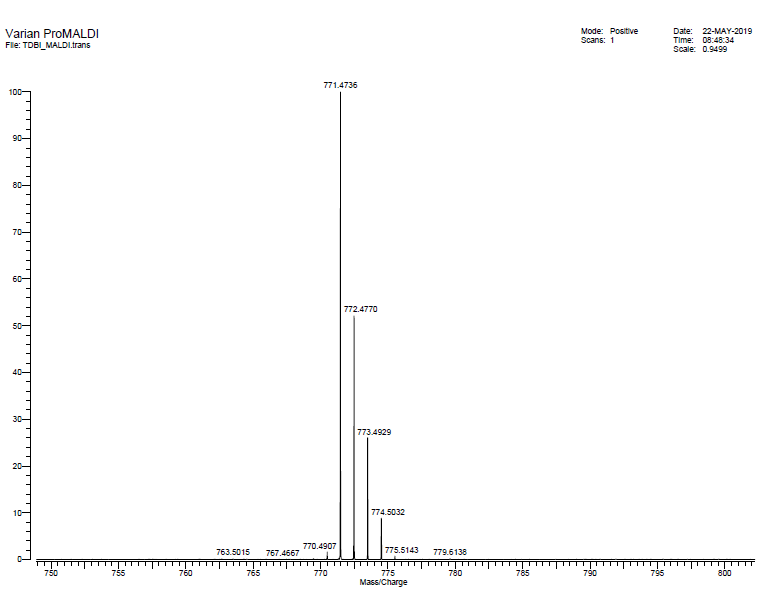
**

**
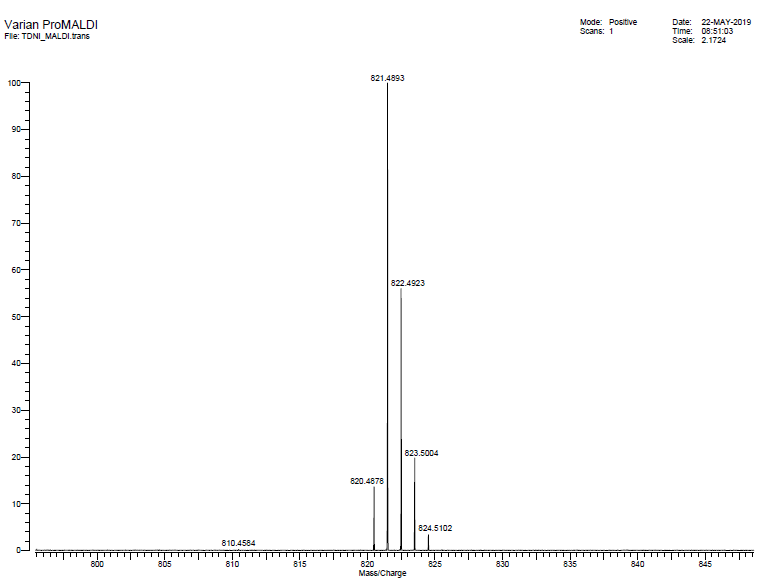
**

**
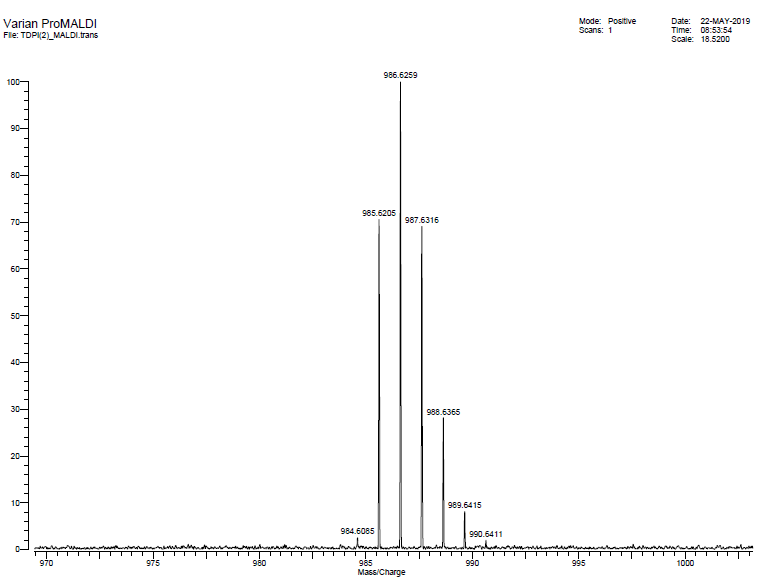
**


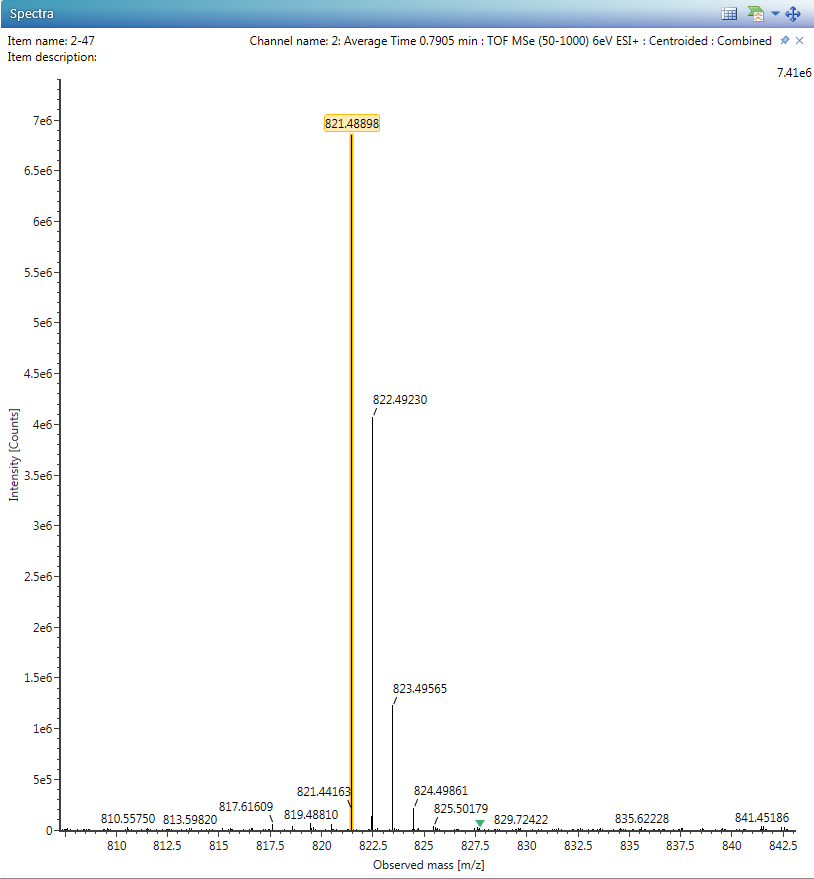


**
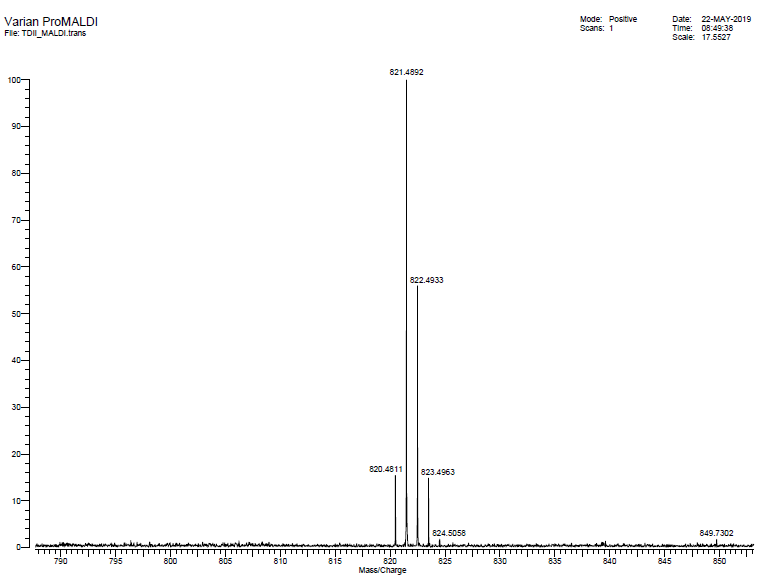
**
